# Supplementary material for: Retrieving Secondary Forest Aboveground Biomass from Polarimetric ALOS-2 PALSAR-2 Data in the Brazilian Amazon
Source: Preprints.org preprint supplement (doi:10.20944/preprints201807.0604.v1), 2018-07-31
Supplement: Supplementary file 1 [file supplementary]

Supplementary material

Retrieving Secondary Forest Aboveground Biomass from Polarimetric ALOS-2 PALSAR-2 Data in the Brazilian Amazon

Supplementary material of Retrieving Secondary Forest Aboveground Biomass from Polarimetric ALOS-2 PALSAR-2 Data in the Brazilian Amazon


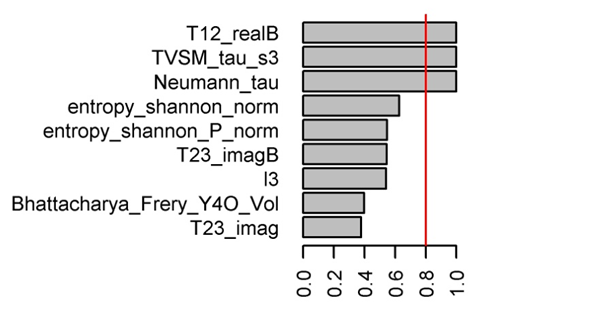

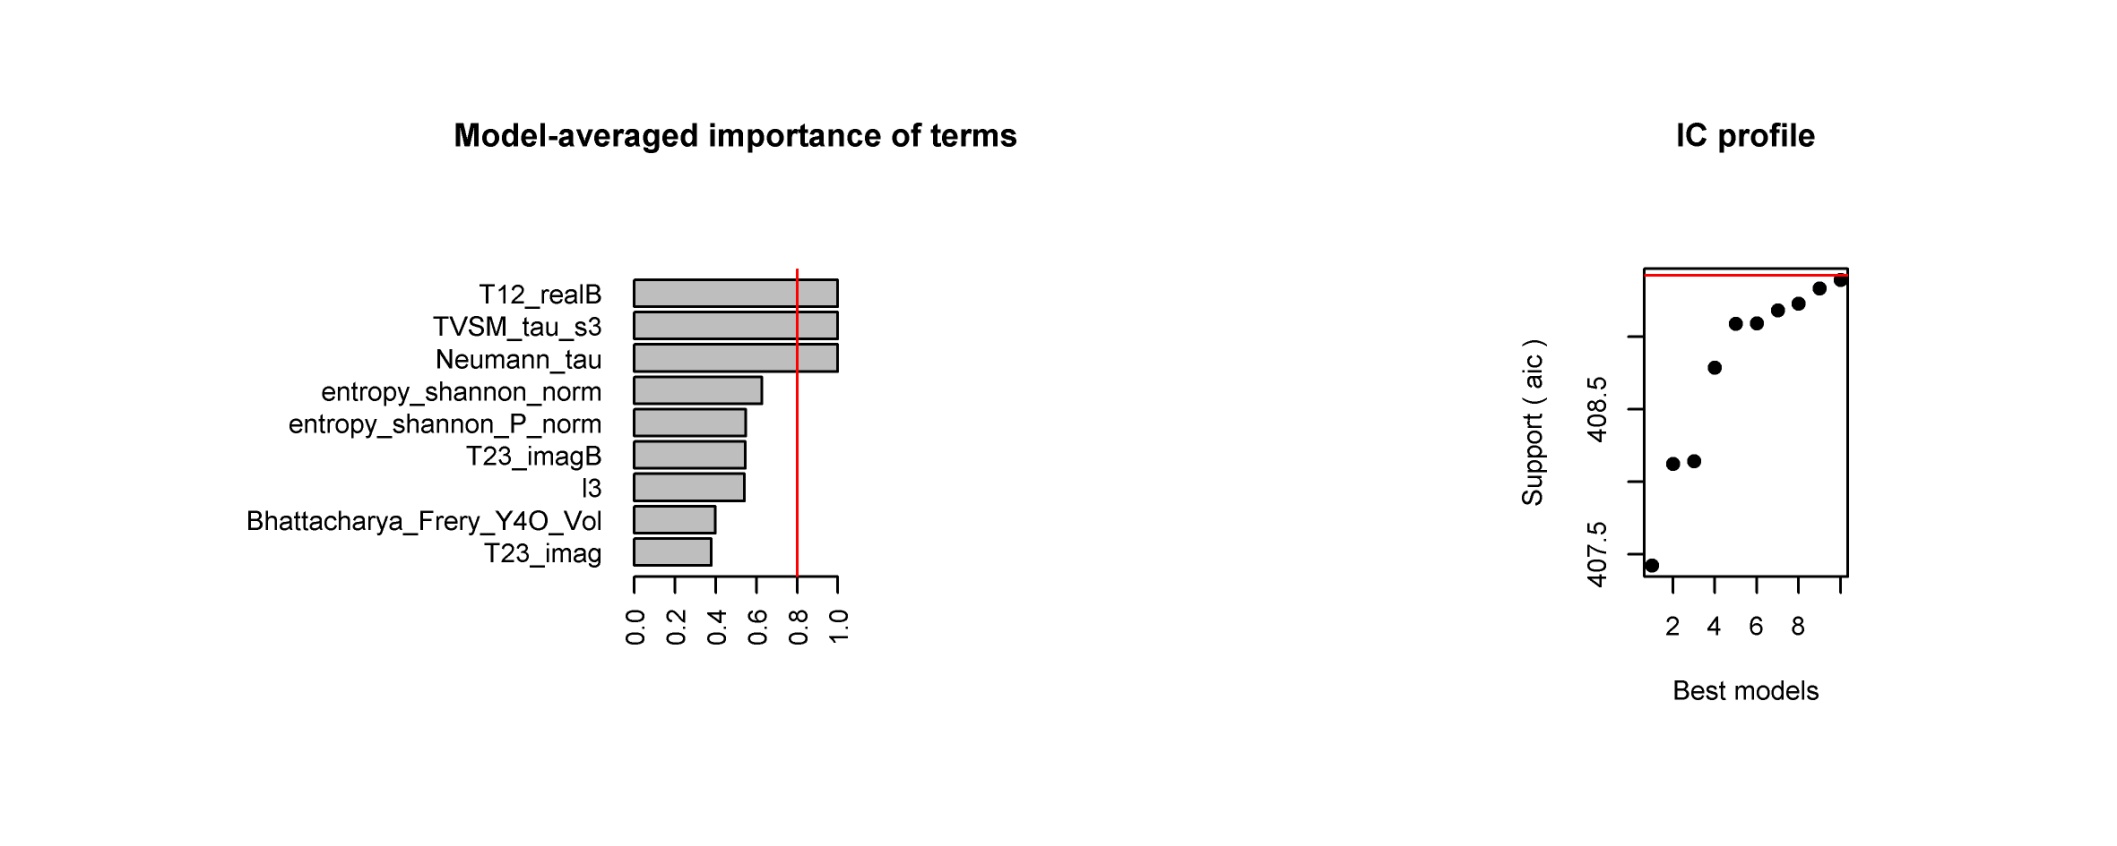


**Figure S.1.** Performance of multiple linear models for modelling AGB of secondary forest at Santarém site. A. The best predict polarimetric attributes. B. Akaike Information Criterion of models with ∆ AIC < 2.


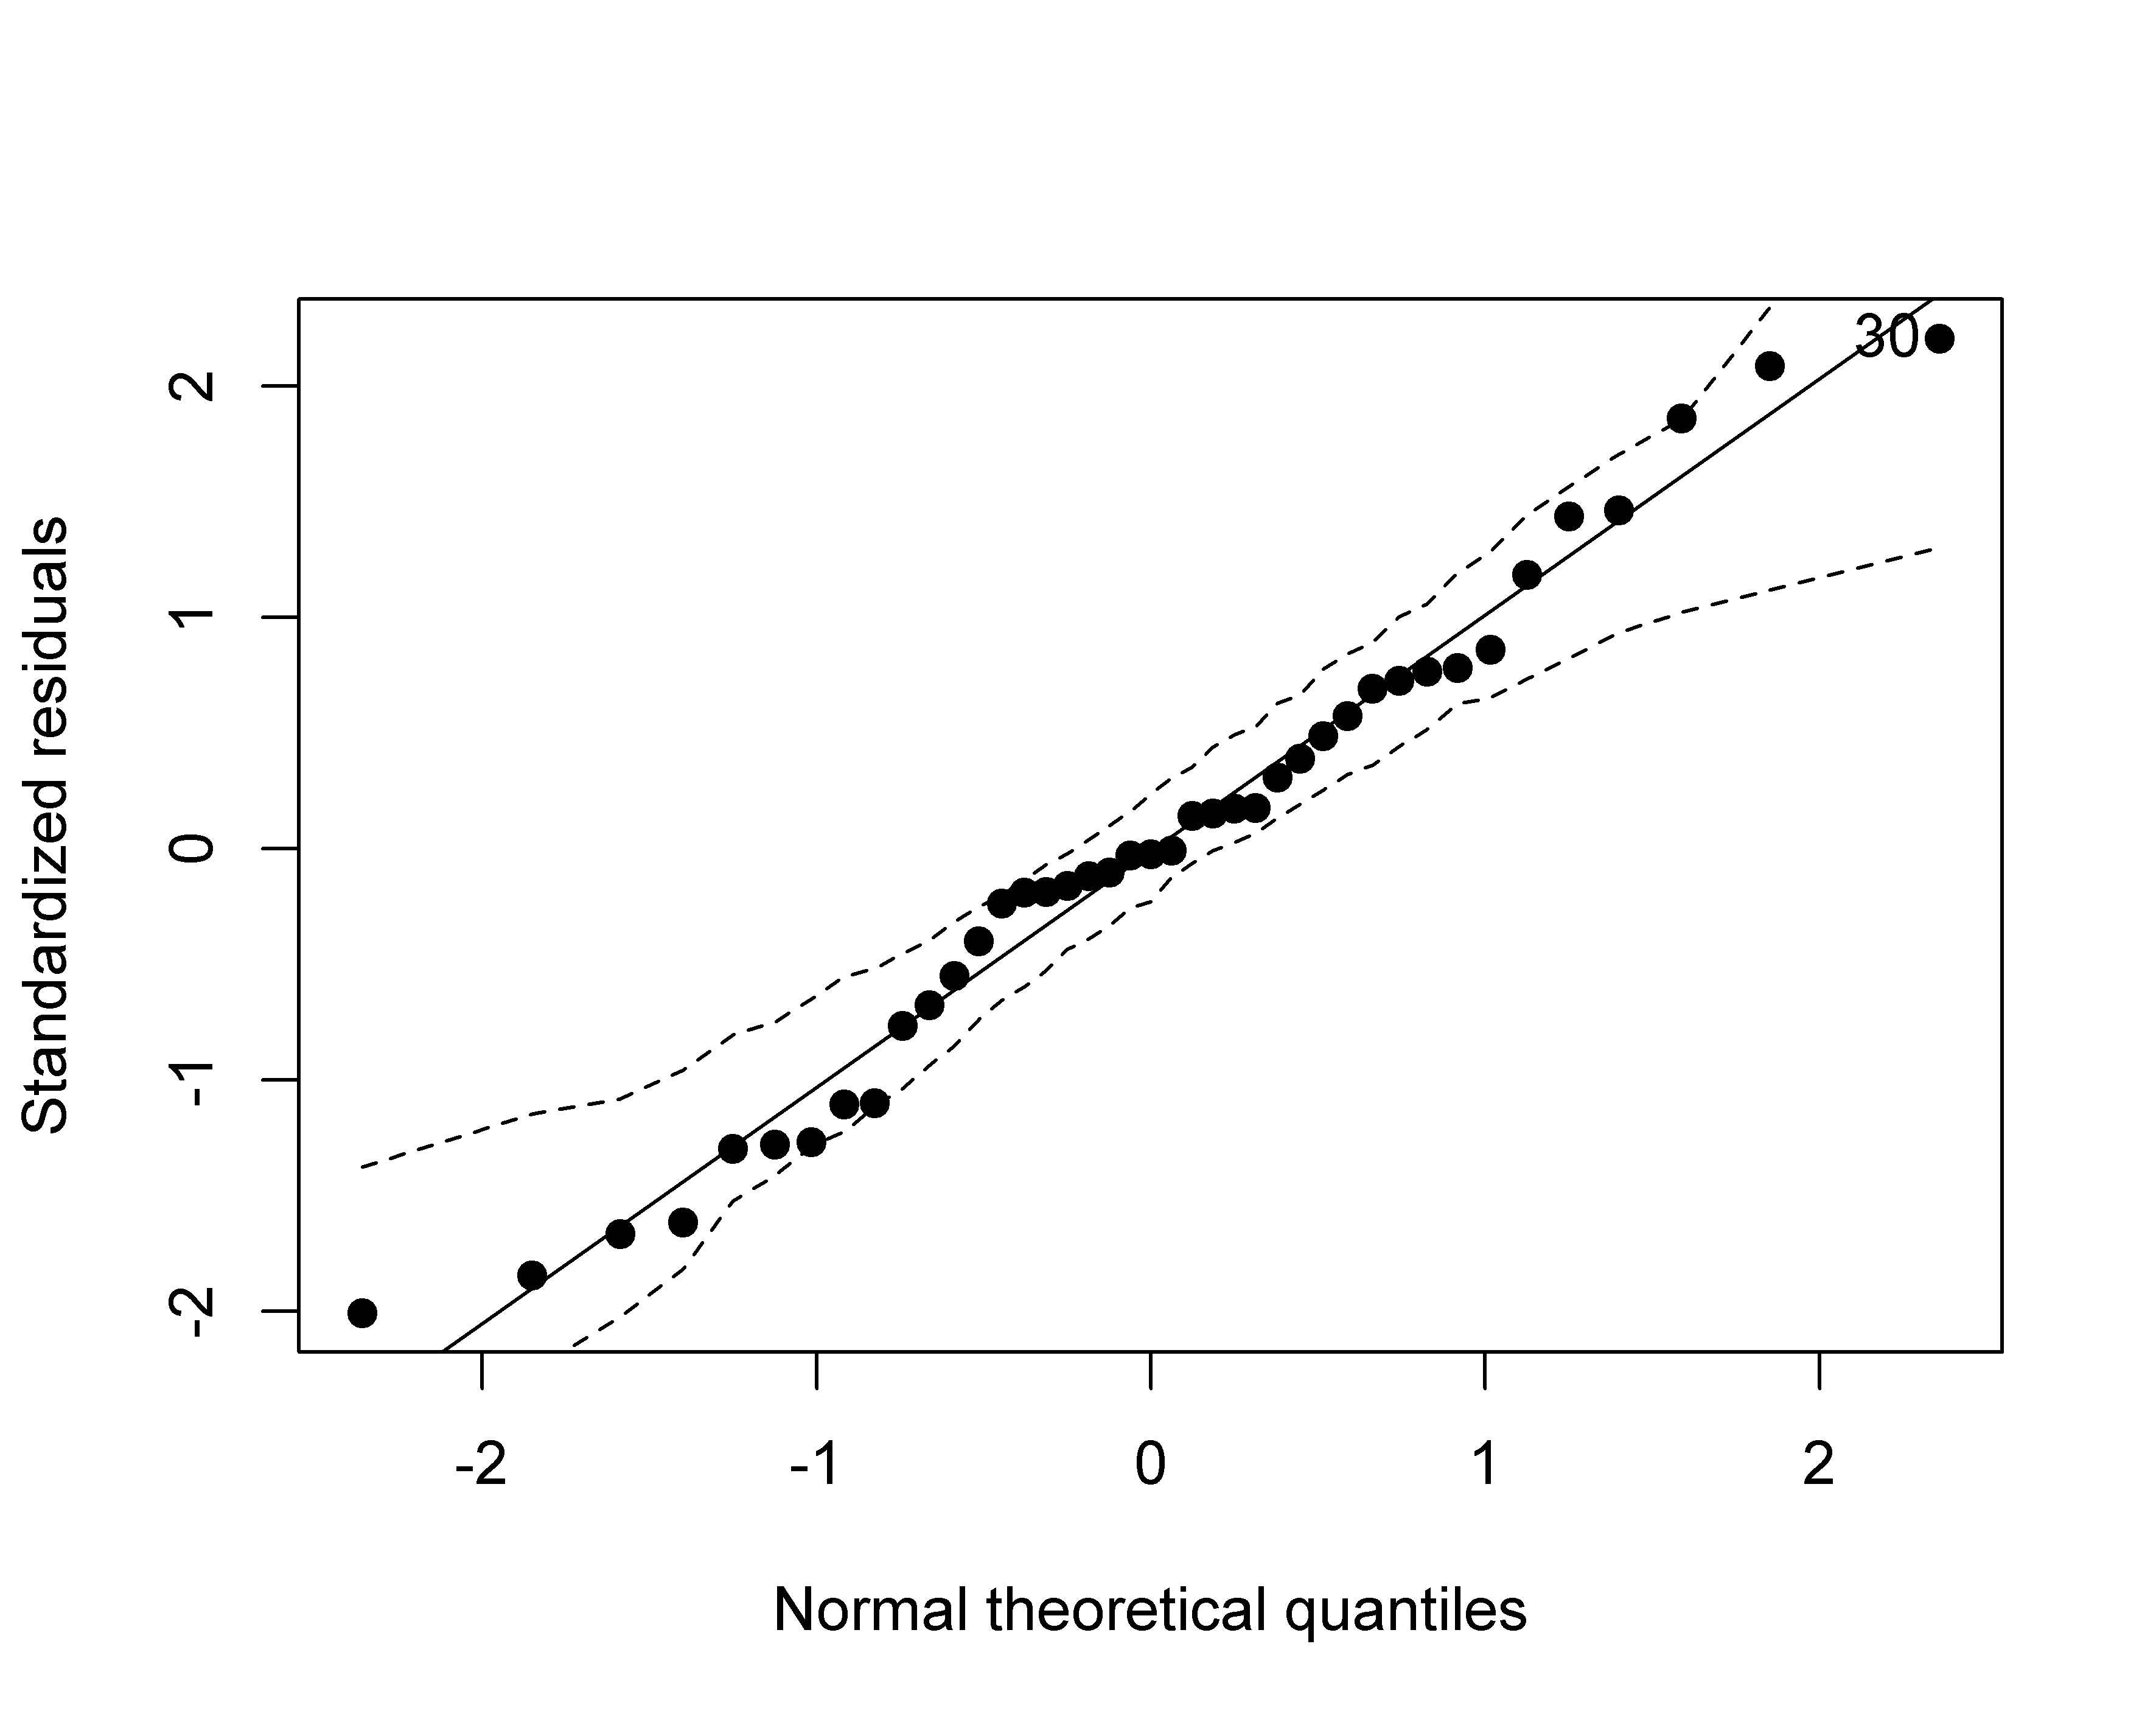

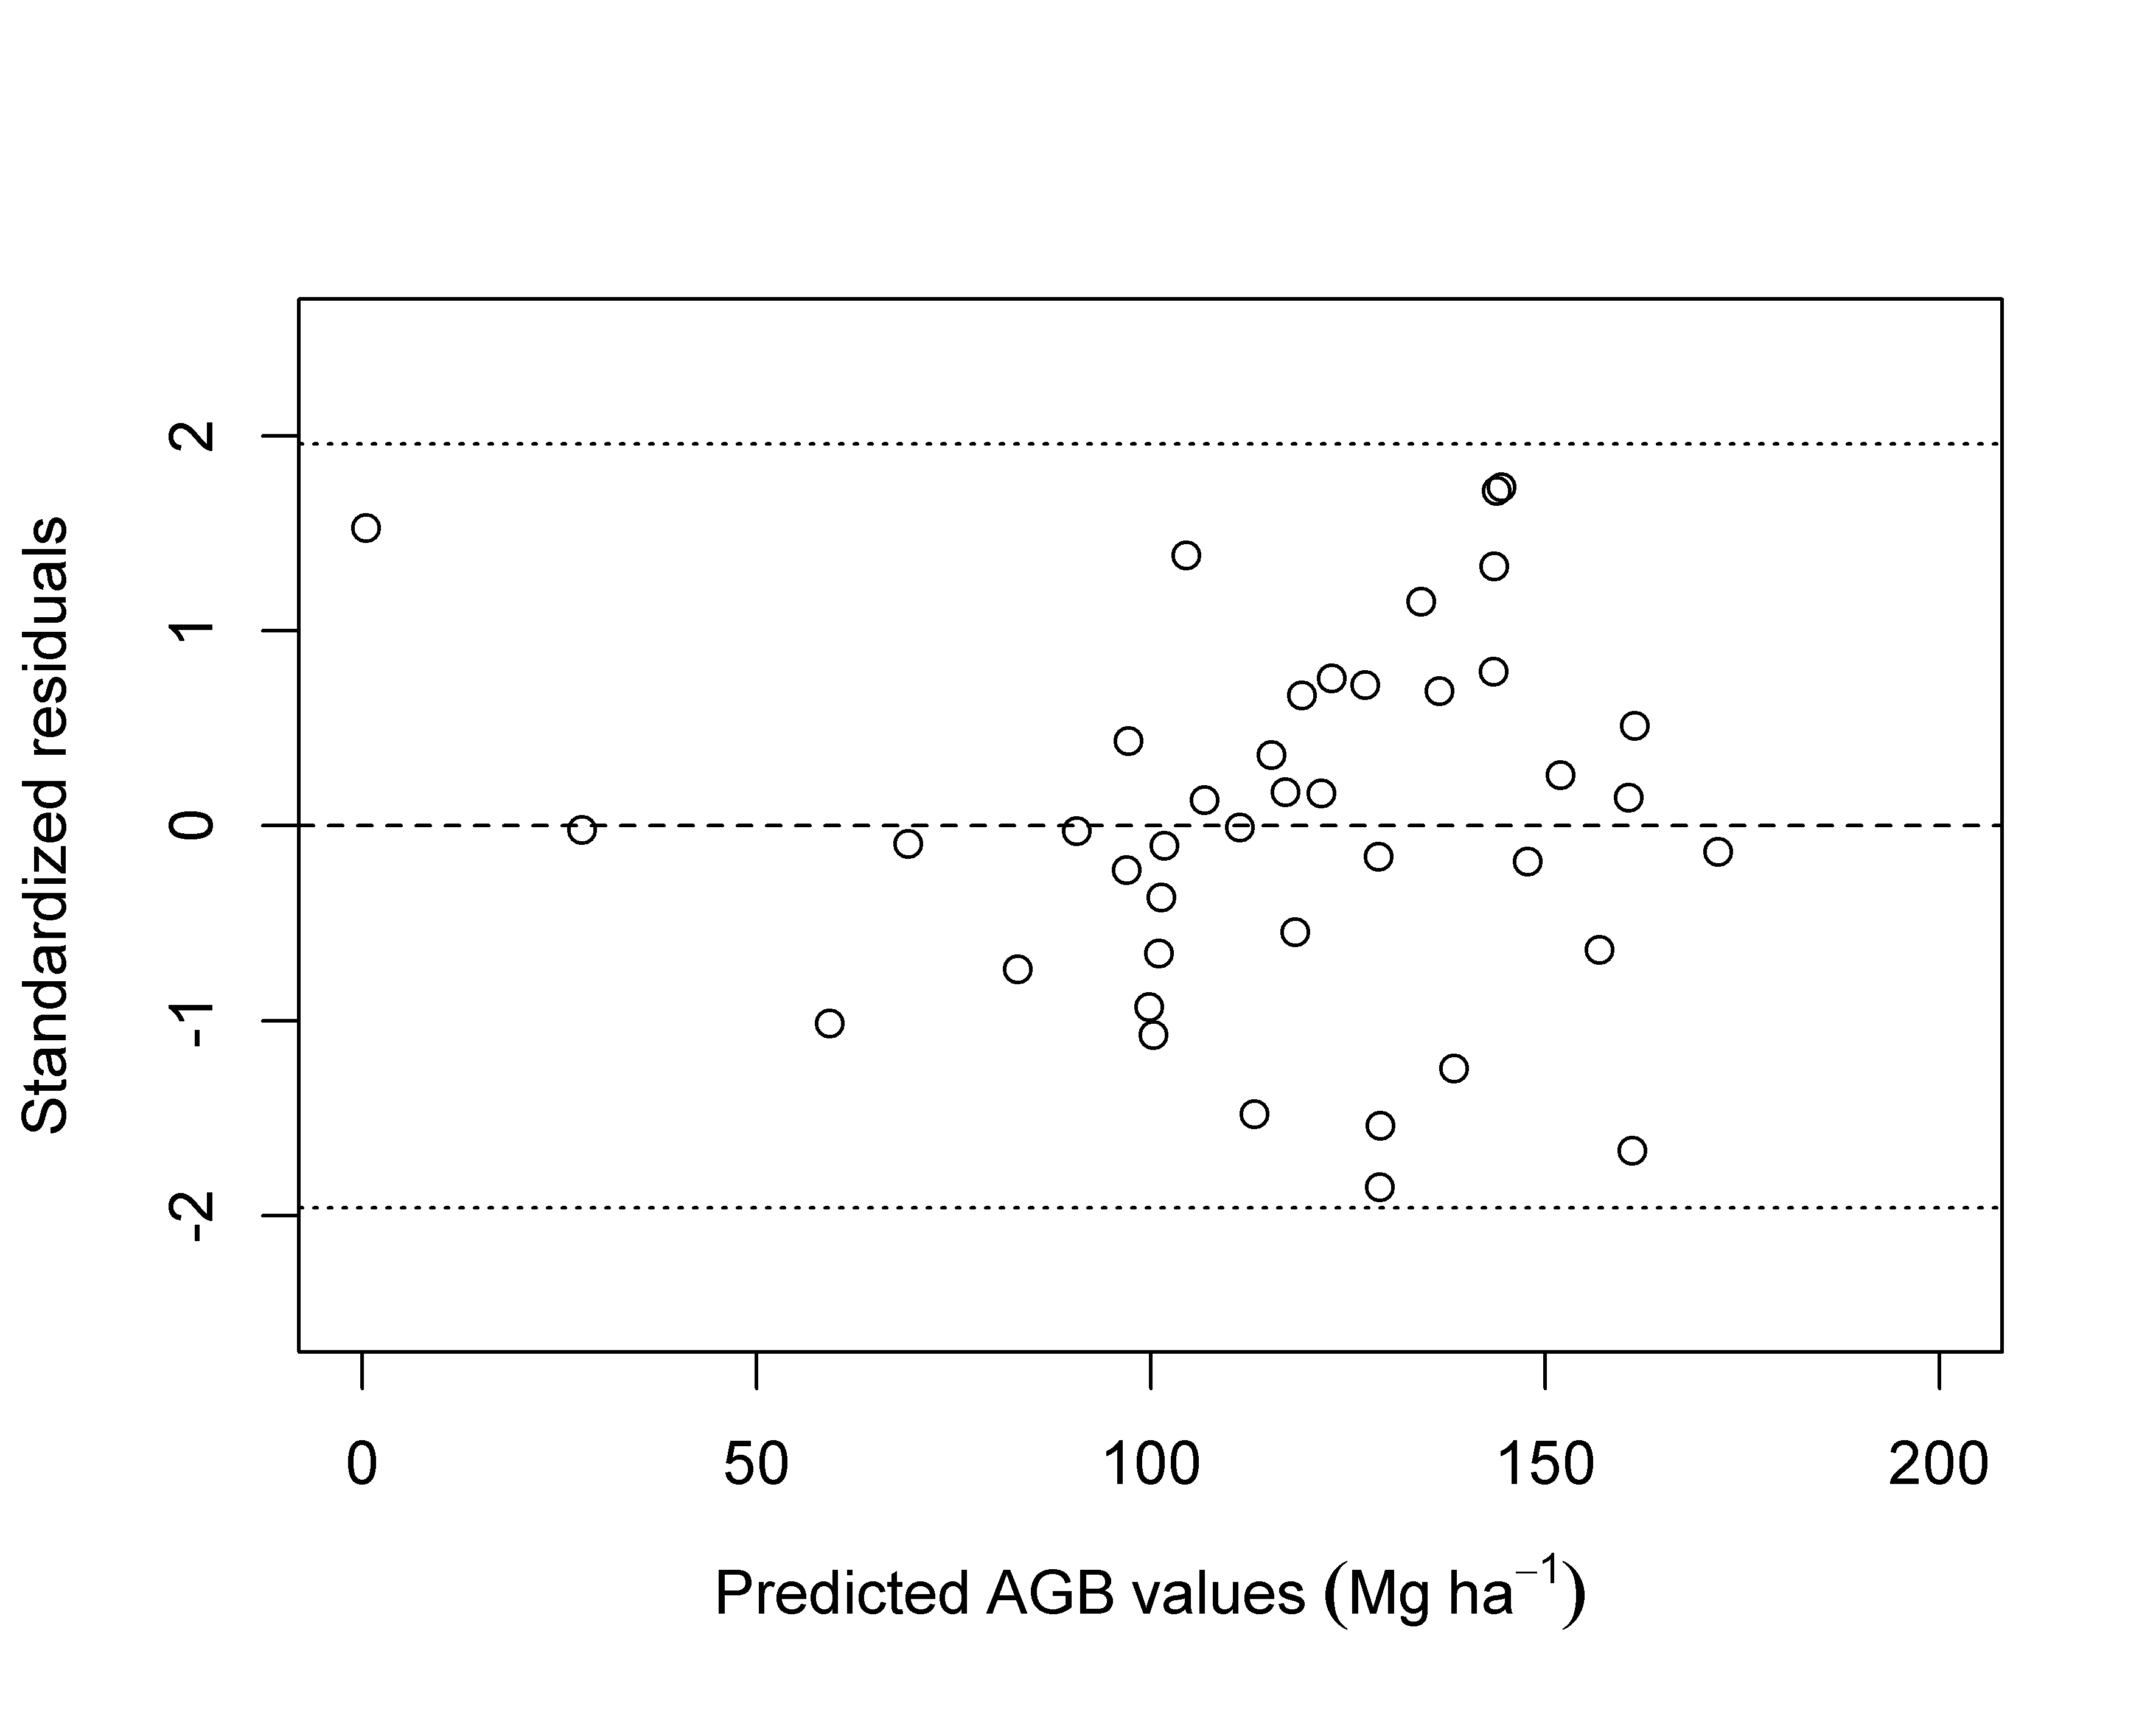


**Figure S.2.** Standardized residuals distribution for the MLR model selected. A. The Normal QQplot and B. Against predicted AGB values.


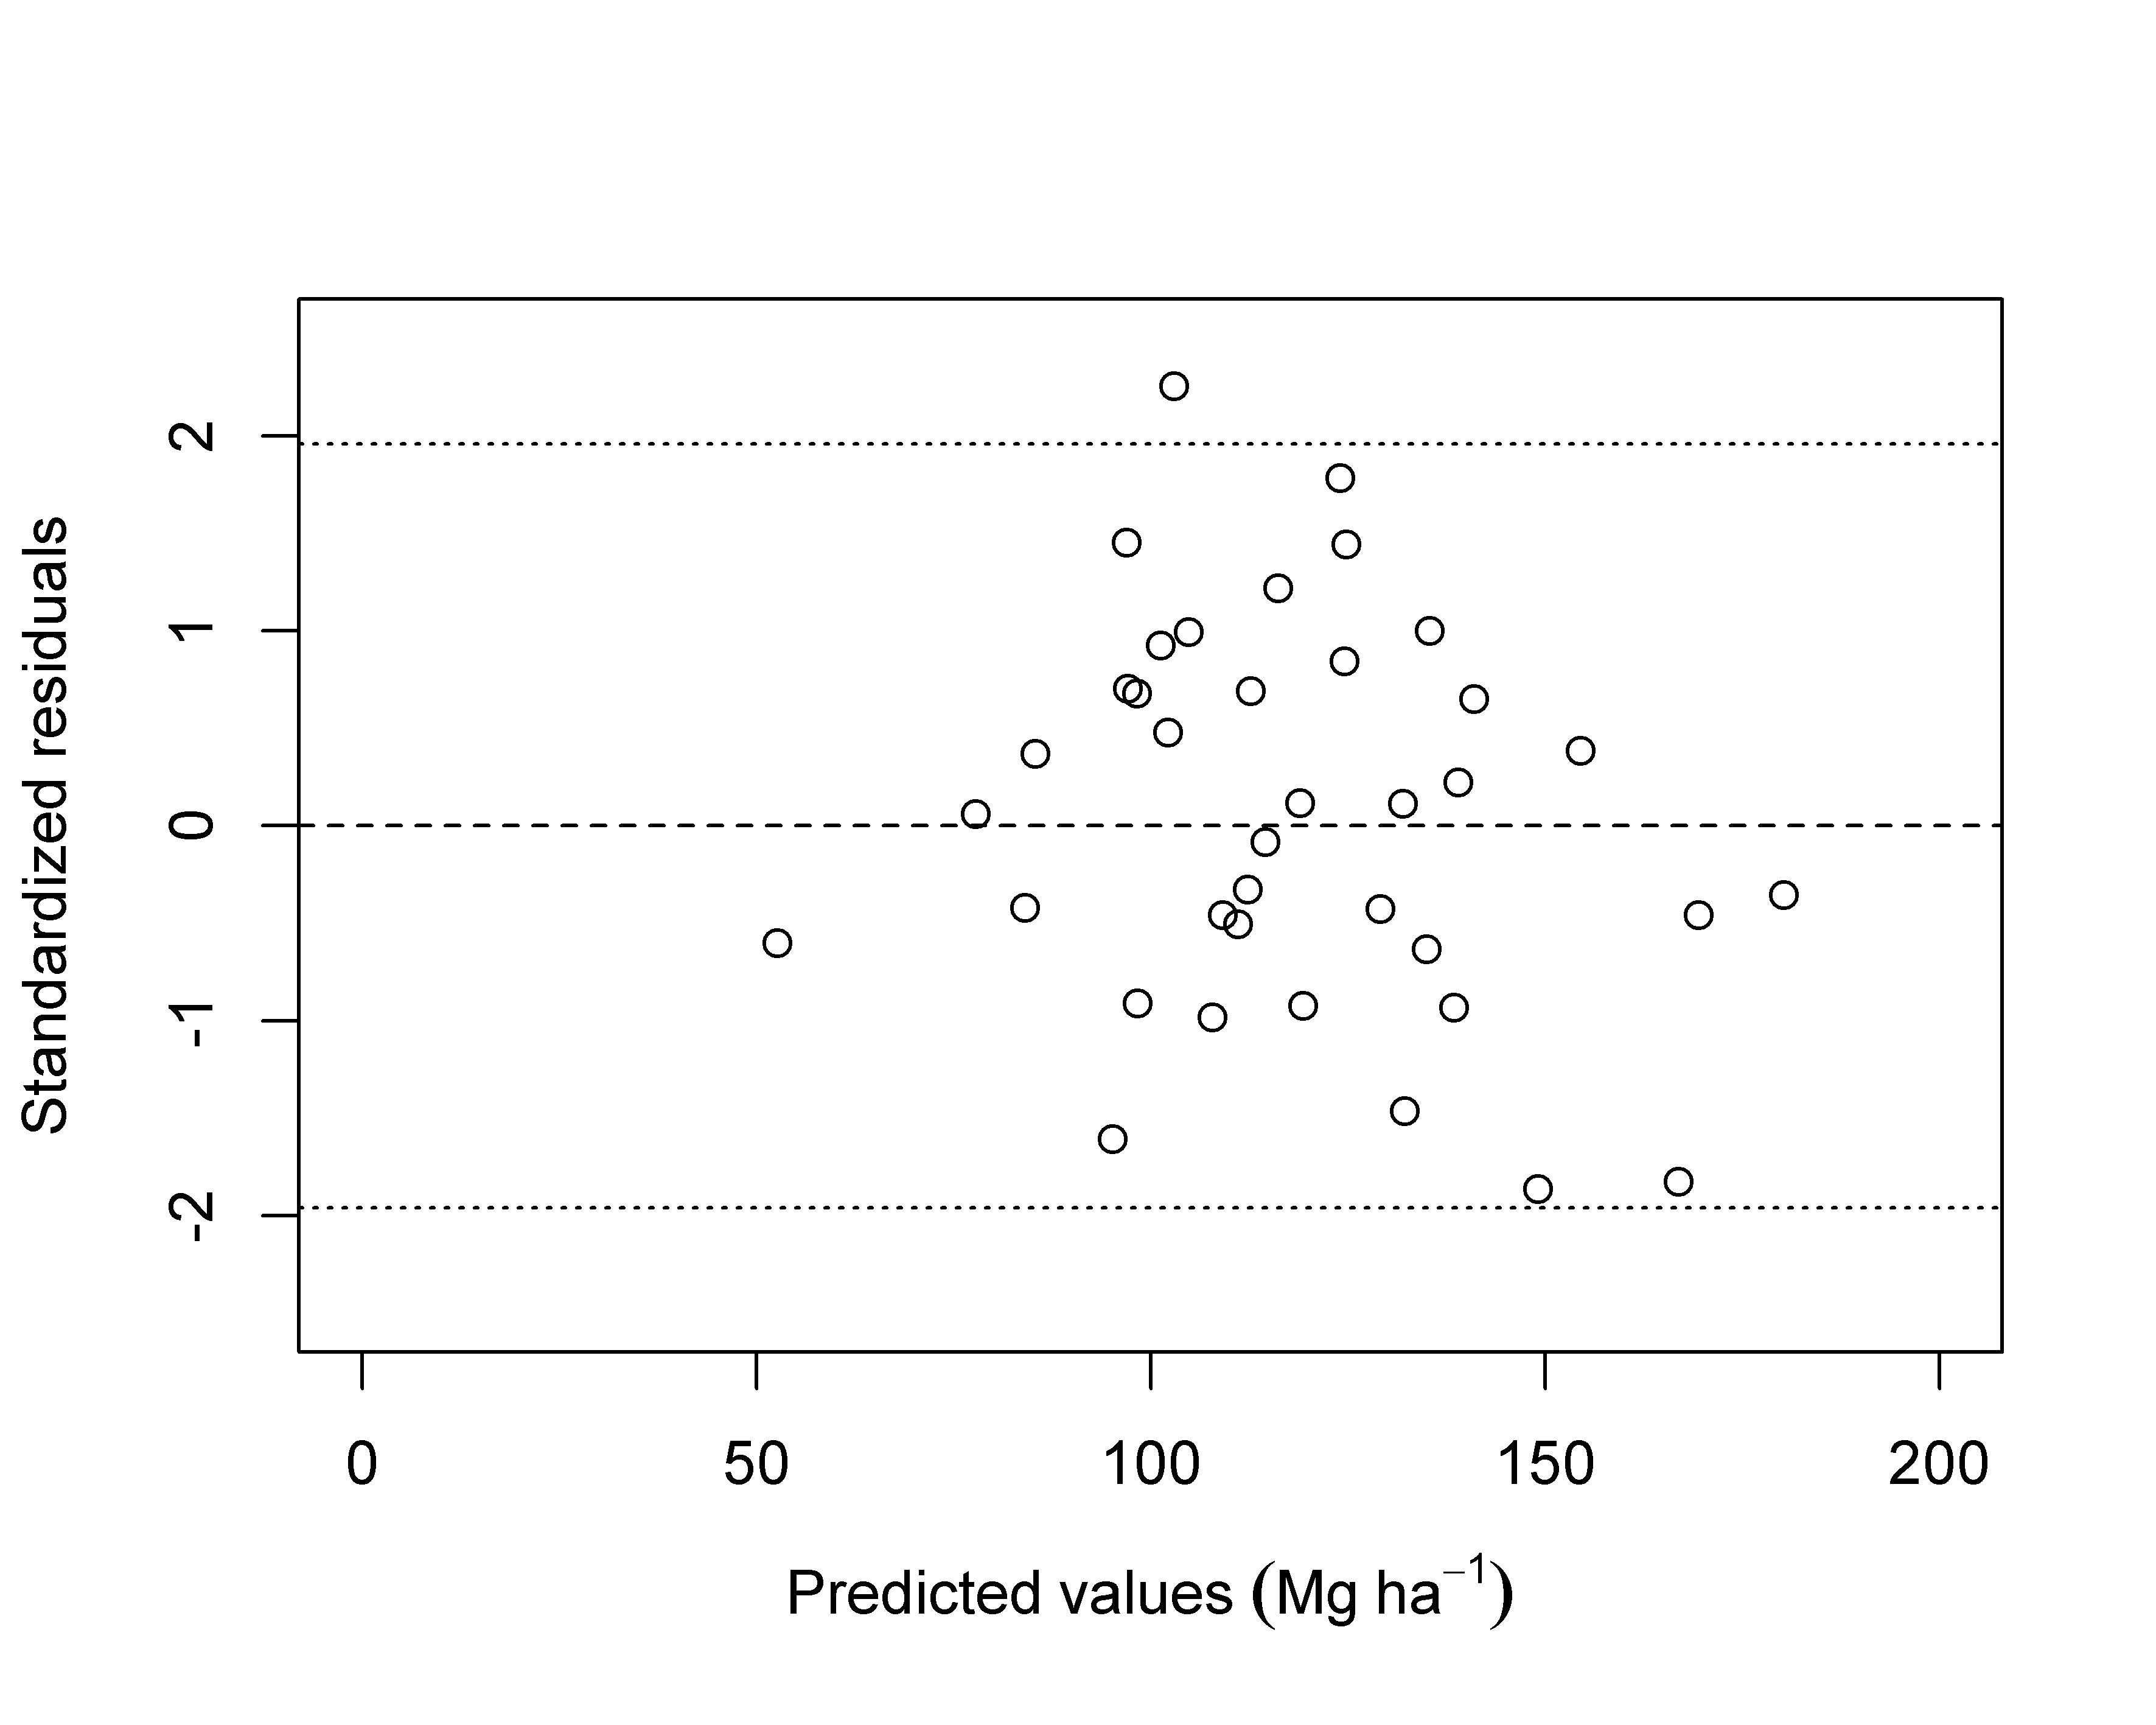


**Figure S.3.** Distribution of the standardized residuals of the semi-empirical EWCM model for the AGB estimation in the SF at Santarém study site.
